# Supplementary material for: An Experimental Analysis of Five Household Equipment-Based Methods for Decontamination and Reuse of Surgical Masks
Source: MDPI journal article supplement (doi:10.3390/ijerph19063296), 2022-03-11
Supplement: s1 [file s1]

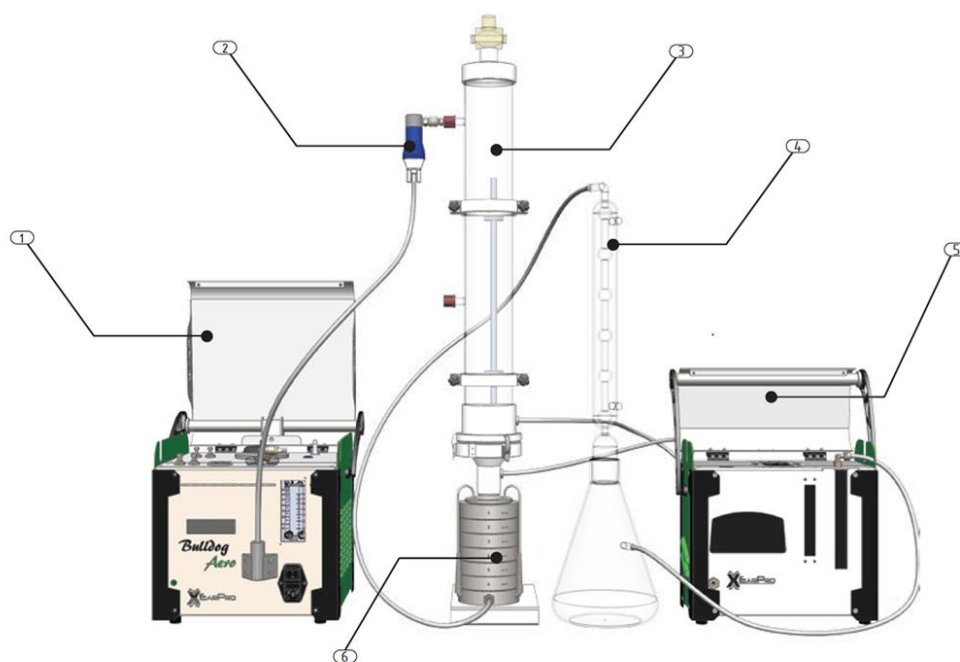

**Supplemental Figure S1.** Bulldog Plus Bio system configuration for BFE analysis: electronic sampler Bulldog Aero (1), an aerosol generator, that produces aerosol particles by nebulizing the bacterial solution (2), a pyrex and Teflon aerosol chamber (3), a glass condenser placed downstream of the impactor (4), an electronic flow sampler Bulldog Plus Bio (5) and an Andersen-type six-stages cascade impactor (6).

**Supplemental Table S1.** Cut-point sizes of the Andersen impactor.

| Stage | $D_{50}$ , $\mu\text{m}$ |
|-------|--------------------------|
| 1     | 7.1                      |
| 2     | 4.7                      |
| 3     | 3.3                      |
| 4     | 2.1                      |
| 5     | 1.1                      |
| 6     | 0.65                     |

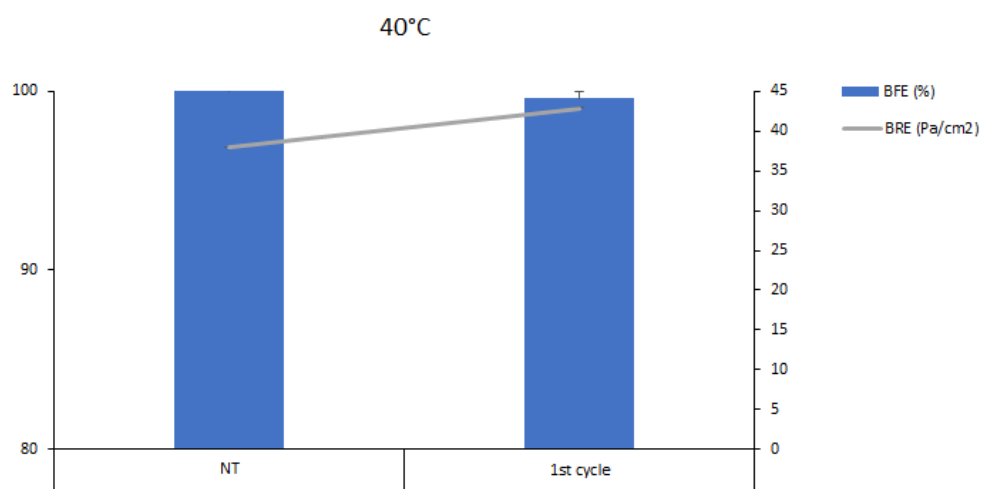

**Supplemental Figure S2.** Evaluation of Bacterial Filtration efficiency (BFE) (%) and Breathability (BRE) (Pa/cm<sup>2</sup>) after one cycle of water immersion at 40 °C.
